# Supplementary material
Source: publisher figshare collection journal article supplement (https://frontiersin.figshare.com/ndownloader/files/31321729)
Supplement: Supplementary file 1 [file 31321729]

**The ‘rocket framework’: A novel framework to define key performance indicators for Nature-based Solutions against shallow landslides and erosion**

Alejandro Gonzalez-Ollauri1,*, Karen Munro1, Slobodan B. Mickovski1, Craig S. Thomson1, Rohinton Emmanuel1

1 The BEAM Research Centre, School of Computing, Engineering and Built Environment, Glasgow Caledonian University, Glasgow G4 0BA, Scotland, UK

* Correspondence:

Corresponding Author: [alejandro.ollauri@gcu.ac.uk](mailto:alejandro.ollauri@gcu.ac.uk)

**SUPPLEMENTARY MATERIAL**

Table . Indicators repository originating from the 'rocket framework' (Figs. 2 and 3) to establish the baseline (B), select (S), deploy (D), monitor (M) and upscale (U) plant-based NBS against landslides and erosion

| Project stage | Domain | Compartment | Indicator Number | Indicator | Metric | Measurement unit | Description | Potential threshold | Relationship with NBS performance | Ref |
| --- | --- | --- | --- | --- | --- | --- | --- | --- | --- | --- |
| BASELINE (B1) | Scale | Scale | B1 | Spatial scale | OAL geometry  OAL area | m2 | Size of the boundary of the site in which the NBS actions are planned or deployed |  | Determines the size of intervention, and the number of NBS actions to ensure connectivity and optimum performance | Bock et al., 2005 |
|  |  |  | B2 | Time scale | Time step | Various | A scale used to represent periods of time or time steps for a process, variable, or sequence of events |  | Determines the observational periodicity, the recurrence of challenges and the envisaged time in which a tangible NBS performance can be observed | Mickovski and Thomson, 2017 |
|  | Environmental | Hydro-climatic | B3 | Precipitation | Rainfall depth | mm d-1 | The amount of liquid precipitation per unit area, generally measured as water column height | 12.7 mm d-1 | Principal driver of landslides and erosion. The eco-engineering performance of the NBS actions mostly focus on the ability of the NBS to regulate the rainfall’s water flux at the plant-soil-atmosphere interface | Renard et al., 1997  Gires, 2018  Gonzalez-Ollauri and Mickovski, 2017a |
|  |  |  | B4 | Air temperature | Temperature | oC | Mean daily air temperature | < 10oC | Related to atmospheric demand for water and soil wetness. Soil is less prone to landslides and erosion when soil wetness is at its optimum | Gonzalez-Ollauri et al., 2020 |
|  |  |  | B5 | Sunshine duration | Hours of direct solar radiation | h day-1 | The length of time that the ground surface is irradiated by direct solar radiation | 120 W m-2 | Related to evapotranspiration and the ability of the NBS vegetation to withdraw water from the soil. Also related to the amount of photosynthetic active radiation reaching the NBS, which will determine plant growth rate | Ahmad et al., 2017. |
|  |  |  | B6 | Atmospheric pressure | Barometric pressure | kPa | force exerted against a surface by the weight of the air above the surface | < 109 kPa | Related to the atmospheric demand for water and to evapotranspiration, which is in turn related to the ability of the NBS vegetation to withdraw water from the soil | UK Met Office, 2021 |
|  |  |  | B7 | Prevailing wind | Wind direction  Wind speed | oN  m s-1 | the wind direction and average speed that is predominant or most usual at a particular place or season |  | Related to the local climate and to evapotranspiration rate, thus to soil wetness and the ability of the plant cover established on the NBS to withdraw water from the soil through water uptake | Liuzzo et al., 2016 |
|  |  |  | B8 | Infiltration | Cumulative rainfall infiltration after ponding | mm | Laminar movement of a quantity of water within a porous material per unit area and time after ponding in the surface has formed | >10-7 m s-1 | Related to the amount of rainfall infiltrating the soil, saturating the soil and/or reaching out the rhizosphere. Infiltrating rainfall can foster soil saturation and the onset of landslides and erosion events | Mein and Larson, 1973 |
|  |  |  | B9 | Surface runoff | Water mass balance with precipitation and infiltration  Runoff curve number | mm    - | Rainfall excess not infiltrating in the ground. The curve number is an  empirical parameter used in hydrology for predicting direct runoff or infiltration from rainfall excess and depending on the land cover |  | Surface runoff may foster the detachment of soil particles downslope, increasing the severity of erosion episodes | Hawkins et al., 2019 |
|  |  |  | B10 | Groundwater level | Pore-water pressure | kPa | Height of the water table above a datum, producing positive-pore water pressures as a result of the head of the water column | < 0.5 m | Related to the mechanical strength of the soil materials and the ability of the NBS vegetation to withdraw water from the soil. Water tables near the ground surface saturate the soil profile with water, being problematic for landslide and erosion events, and inhibit plant water uptake and plant growth due to the lack of oxygen. It also leads to anoxia, which alters the normal functioning of the soil ecosystem | Lu and Likos, 2004 |
|  |  |  | B11 | Atmospheric demand for water | Evapotranspiration rate | mm m-2 d-1 | the process by which water is transferred from the land to the atmosphere by evaporation from the soil and other surfaces and by transpiration from plants | < 1 mm m-2 d-1 | Related to soil wetness and the ability of NBS vegetation to withdraw water from the soil | Allen et al., 1998 |
|  |  | Land surface | B12 | Soil texture | Particle size distribution | % | Relative content of soil particles of various sizes such as gravel, sand, silt and clay | >85 % sand | Related to soil strength, permeability, water retention, ability of the soil to sustain life | Head, 1980 |
|  |  |  | B13 | Soil structure | Soil aggregate stability | % | how well a **soil** can resist raindrop impact and water erosion, while size distribution of dry **aggregates** can be used to predict resistance to abrasion and wind erosion. |  | Related to soil strength, permeability, water retention, ability of the soil to sustain life | Amezketa, 1998 |
|  |  |  | B14 | Permeability | Saturated hydraulic conductivity | mm s-1 | Ability of the soil to conduct water through its matrix under water saturation conditions | <10-6 mm s-1 | Related to the duration of the period in which the soil remains saturated with water. Related to the ability of the soil matrix to release water into the atmosphere and underground reservoirs. Related to the amount of rainfall able to infiltrate the soil and with the generation of runoff. Also related to the ability of water to reach the rhizosphere, and impervious soil layers, where perched water tables can built up | Head and Epps (2011) |
|  |  |  | B15 | Erosivity | R-factor | MJ mm ha-1 h-1 yr-1 | a measure of the potential ability of soil, regolith, or other weathered material to be eroded by rain, considering both rainfall amount and intensity | >900 MJ mm ha-1 h-1 yr-1 | Related to likelihood and extent of erosion events | Zorn and Komac, 2016  Panagos et al., 2015 |
|  |  |  | B16 | SOM | Soil organic carbon | % | carbon component of the organic compounds stored in the soil | < 2 % | Related to soil structure, soil fertility, water retention and the ability to sustain life | Jobbagy, 2000 |
|  |  |  | B17 | Soil nutrients | Soil fertility | g kg-1 | Concentration of nitrogen, phosphorus and potassium, essential nutrients for the development of plants and functioning of the soil microbial communities | <5 g N kg-1 | Related to plant growth and development in the NBS and to the ability of the soil to sustain life and biogeochemical processes | Bünemann et al., 2018 |
|  |  |  | B18 | Soil alkalinity | Soil pH | - | measure of the acidity or basicity (alkalinity) of a soil. pH is defined as the negative logarithm (base 10) of the activity of hydronium ions in a solution | < 5  >7.5 | Related to soil fertility, to plant growth and development in the NBS, and to the ability of soil to sustain life and biogeochemical processes | Robson, 1989 |
|  |  |  | B19 | Soil Salinity | Electric conductivity  CEC (cation-exchange capacity) | dS m-1    mol kg-1 | A measure of the total soluble salt in the soil  total capacity of a soil to hold exchangeable cations. It influences the soil's ability to hold onto essential nutrients and provides a buffer against soil acidification | >5 dS m-1 | Related to soil fertility, to plant growth and development in the NBS, and to the ability of soil to sustain life and biogeochemical processes | Kotuby-Amacher et al., 2000 |
|  |  |  | B20 | Slope topography | Slope angle | o | measure of steepness or the degree of inclination of a feature relative to the horizontal plane | >45o | Related to the probability of landslides and erosion. Related to the generation of surface runoff and the patterns of subsurface flow and water accumulation (i.e. soil wetness). Also related to plant growth and development and to the workability of a particular site | Lu and Godt, 2013 |
|  |  |  | B21 | Topographic aspect | Aspect | oN | the compass direction that a slope faces to the North direction | <90oN | Related to the amount of incoming solar radiation, thus related to soil wetness, plant establishment and development, to plant diversity and to soil fertility | Dorner et al., 2002 |
|  |  |  | B22 | Topographic curvature | curvature | Qlt. | The profile curvature values represent the morphology of the topography with a positive curvature attesting to an upwardly concave and a negative curvature, which indicates upwardly convex, and a value zero, which indicates the flat surfaces | concave | Related to the probability of landslides and erosion. Related to the generation of surface runoff and the patterns of subsurface flow and flow accumulation. Related to soil wetness and fertility. Also related to plant growth and development, and to the workability of a particular site | Chapman, 2000 |
|  |  |  | B23 | Soil porosity | Soil bulk density | g cm-3 | Mass of soil in a given volume | < 1.6 g cm-3 | An indicator of soil compaction, strength, porosity, water storage, and thus, soil wetness. Bulk density above threshold tends to inhibit root growth | Lu and Godt, 2008  McKenzie et al., 2002 |
|  |  |  | B24 | Soil strength | Soil cohesion  Friction angle | kPa  o | Magnitude of the shear stress that a soil can sustain | < 5 kPa | Related to the probability of landslides and erosion. Soil strength is particularly reinforced hydro-mechanically by the presence of a dense plant cover in the NBS | Lu and Likos, 2004  Gonzalez-Ollauri and Mickovski, 2017b |
|  |  |  | B25 | Soil water retention | Soil water at field capacity  Soil water at wilting point  Soil water retention function | ppu    ppu | Ability of soil to retain water within its matrix under a range of matric potentials |  | Related to the water available to plants in the soil. Related to soil wetness and the duration of periods in which the soil is saturated with water, leading to soil weakness and anoxia | Lu and Likos, 2004  Kirkham, 2005 |
|  |  |  | B26 | Land cover | Area of forest cover  Area of agricultural land  NDVI (normalized difference vegetation index) | Ha    Ha | Physical material at the surface of the Earth |  | Related to the probability of landslides and erosion. Related to soil attributes, and to the ability to undertake NBS projects.  Related to the local availability of plant materials for the NBS actions (e.g. availability of plant species able to propagate from cuttings in the local vicinity) | Toohey et al., 2018 |
|  | Socio-economic | Socio-geographic | B27 | Landscape capacity | Landscape character index |  | Sensitivity of landscape to accept changes |  |  | Tudor, 2014 |
|  |  |  | B28 | Population profile | Demographic data (gender, age) | Number  % | Gender and age distribution of population within study area | Regional or National average | Related to establishing any limitations in involving stakeholders in physical NBS co-deployment i.e. very young or very old populations may struggle to participate.  Related to comparing study area with others in past studies | Creswell and Creswell, 2018 |
|  |  |  | B29 | Education | Population with no formal qualifications, educated to high school, further education, higher education, doctorate level | Number  % | Highest level of education obtained by population within study area | Regional or National average | Related to comparing study site with others in past studies  Related to stakeholder approaches and communication strategies for co-creation | Creswell and Creswell, 2018 |
|  |  |  | B30 | Social support | Population in receipt of state support either financial or services | Number  % | Proportion of population within study area who are receiving state support such as benefits, discounted rent or council tax, discounted or free travel etc | Regional or National average | Related to comparing study site with others in past studies  Related to understanding ability of study area population to commit resources although does not necessarily speak to willingness to do so | Creswell and Creswell, 2018 |
|  |  |  | B31 | Employment | Population unemployed, part-time employed, full-time employed, self-employed, student, retired | Number  % | Employment-type distribution of population within study area | Regional or National average | Related to comparing study site with others in past studies  Related to opportunities or barriers planning co-creation activities i.e. free-time for volunteering, organised public meetings etc | Creswell and Creswell, 2018 |
|  |  | Economic | B32 | Income | Average income relative to national average | Number  (£ / €) | Household incomes within study area | Regional or national average | Related to comparing study site with others in past studies  Related to understanding ability of study area population to commit resources although does not necessarily speak to willingness to do so | Creswell and Creswell, 2018 |
|  |  |  | B33 | Housing | Average home ownership relative to national average | Number  % | Proportion of population within study who own their own home, or those in private rented or social housing | Regional or national average | Related to comparing study site with others in past studies  Related to establishing levels of cognitive investment in local area  Related to ownership of land NBS may be deployed on | Creswell and Creswell, 2018 |
|  |  |  | B34 | Prices of lots | Average price of lot of land | Number  (£ / €) | Average price of land by m2 in the study area | Regional or national average | Related to establishing the extent to which value of land is affected by the likelihood of a landslide event | Trojanek et al, 2018 |
|  |  |  | B35 | Property prices | Average property price | Number  (£ / €) | Average price of houses per m2 in the study area | Regional or national average | Related to establishing the extent to which property prices are affected the by likelihood of a landslide event | Trojanek et al, 2018 |
| SELECTION (S) | Hazard | Predictive | S1 | Slope stability | Factor of safety | - | Ratio between driving and resisting forces on the basis of limit equilibrium method for slope stability and depending on a series of soil hydro-mechanical variables | < 1.2 | Related to the likelihood of landslide event. The NBS action should increase the factor of safety beyond 1.2 though the provision of an effective performance in terms of the mechanical and hydrological reinforcement of the intervened area. | Lu and Godt, 2013  Gonzalez-Ollauri and Mickovski, 2017a |
|  |  |  | S2 | Erosion rate | Net soil detachment | Mt Ha-1 | Rill and interill net erosion due to rainfall quantified in terms of the net soil detachment resulting from the variables integrated in the RUSLE equation |  | Related to soil materials detachment due to erosive forces driven by rainfall and surface runoff. The NBS actions should reduce net soil detachment though the provision of an effective performance in terms of the mechanical and hydrological reinforcement of the intervened area. | Dabney et al., 2012 |
|  |  | Empirical | S3 | Gravitational mass movement | Solid materials transport | kg s-1 | Dislocation of material due to forcing of gravity per unit time |  | Related to landslides and erosion activity, indicating the need of intervention | Highland and Bobrowsky, 2008 |
|  |  |  | S4 | Surface deformation |  | m s-1 | Structural changes of topography or man-made objects due to external forcing |  | Related to landslides and erosion activity, indicating the need of intervention | Highland and Bobrowsky, 2008 |
|  |  |  | S5 | Landslide onset | Size of cracks and fissures | m | Emerging and enlarging of surficial cracks and fissures due to stresses in the material caused by external forcing |  | Related to landslides and erosion activity, indicating the need of intervention | Highland and Bobrowsky, 2008 |
|  |  |  | S6 | Landslide dynamics | Scar geometry | Qlt. | Geometry of the landslide scar, indicating the state or progress of a failure event |  | Related to activity, indicating the need of intervention | Lucas et al., 2011 |
|  |  |  | S7 | Erosion due to water | Average annual soil loss due to rainfall and runoff | Mt Ha-1 | Dislocation of material due to forcing of water |  | Related to erosion activity, indicating the need of intervention | Panagos et al., 2015 |
|  | Risk | Damage | S8 | Number of affected buildings |  | Number  % | Number of buildings that are damaged by a landslide event  Number as a percentage of all buildings in the study area |  | Relating to level of risk and need for intervention | Shah et al, 2020 |
|  |  |  | S9 | Number of fatalities and injuries |  | Number  % | Number of people killed or injured in the landslide event  Number as a percentage of population of study area |  | Relating to level of risk and need for intervention | Shah et al, 2020 |
|  |  |  | S10 | Damage costs to buildings |  | Number  (£ / €) | Financial cost of repairing buildings damaged by a landslide event |  | Relating to impact of risk and need for intervention | Shah et al, 2020 |
|  |  |  | S11 | Damage costs to infrastructure |  | Number  (£ / €) | Financial cost of repairing infrastructure (roads, paths, services etc) damaged by a landslide event |  | Relating to impact of risk and need for intervention | Shah et al, 2020 |
|  |  | Perception | S12 | Insurance valuations |  | Number  (£ / €) | Change in property insurance premiums | Regional or national average | Relating to impact and perception of risk and need for intervention | Shah et al, 2020 |
|  |  |  | S13 | Hazard mitigation perception |  | Qlt | Qualitative survey / focus groups on the extent to which the population perceive themselves and the study area to be at physical, economic or social risk from the landslide hazard |  | Relating to perception of risk and perceived need for intervention which is indicative of NBS acceptance and engagement with co-creation | Shah et al, 2020 |
|  | Selection drivers | Hazard-specific drivers | S14 | Landslide susceptibility | Probability of landslide events |  | Probability of factor of safety for a given slope zone to be above critical value | < 1.2 | Related to the prioritisation of sites needing urgent intervention and to the feasibility of using NBS for managing the hazard | Lu and Godt, 2013 |
|  |  |  | S15 | Erosion susceptibility | Probability of rainfall events with erosivity potential | mm event-1 | Probability that total rainfall amount per event is above/below critical value | >13 mm event- | Related to the prioritisation of sites needing urgent intervention and to the feasibility of using NBS for managing the hazard | Panagos et al., 2015 |
|  |  |  | S16 | Hazard exposure | Relative hazard zone surface area | % | Surface Area prone to landslides and erosion respect to the OAL area | 5 % | Related to the size/scale of the NBS intervention needed to manage the hazards effectively | Mickovski and Thomson, 2018  Gonzalez-Ollauri and Mickovski, 2017c |
|  |  | Site-specific drivers | S17 | Topographic attributes | Slope angle  Aspect  Curvature |  | Set of topographic metrics conditioning the feasibility and amount of work for deploying a given NBS at a site |  | Related to the types of NBS actions that can be considered for a particular site as feasible and effective, and to the features of the NBS action (e.g. plant species composition) | Schiechtl and Stern, 1996 |
|  |  |  | S18 | Soil workability | Soil potential | m | Soil depth with absence of boulders and rock; Also, soil capability supporting tillage |  | Related to the types of NBS actions that can be considered for a particular site as feasible and effective. Related to machine input needs. Also related to the availability of locally available earth materials for construction and for planting/ plant propagation | Müller et al., 2014 |
|  |  |  | S19 | Land capability | Local resources availability | Qlt | Local availability of timber, earth and plant materials |  | Related to the availability of local resources employed in the construction of the NBS actions |  |
|  |  | Economic drivers | S20 | Materials Cost |  | £ | Monetary cost of the materials needed to implement the intervention |  |  |  |
|  |  |  | S21 | Management  Cost |  | £ | Monetary cost of managing the intervention throughout its life cycle |  |  |  |
|  |  | Socio-ecological drivers | S22 | Stakeholder perception and acceptance |  | Qlt. | Ex-ante qualitative evaluation of preferences and acceptance for interventions |  | Related to how NBS options are viewed by stakeholders in terms of costs, maintenance, aesthetic etc. Related to motivating factors in co-creation | Anderson et al, 2021 |
|  |  |  | S23 | Constructability |  | Qlt. | It is to identify obstacles before a project is actually built to reduce or prevent errors, delays, and [cost overruns](https://en.wikipedia.org/wiki/Cost_overrun) |  |  | Tod et al., 2020  European Directive 92/57/EEC |
| DEPLOYMENT (D) |  | Socio-ecological | D1 | Permitting paths |  | Qlt. | Permits and legislation affecting deployment actions during the design and execution stages |  |  | EN 1991  EN 1995-1-1  EN 1997  European Directive 92/57/EEC |
|  |  |  | D2 | Public participation |  | No | Number of stakeholders and people involved in the co-creation and co-deployment phases |  | Related to public willingness to engage with NBS co-creation | Anderson et al, 2021 |
|  |  | Engineering | D3 | Machinery input |  | No. | Number of tools and machines requiring training or specific skills for their operation |  |  | Schiechtl and Stern, 1996 |
|  |  |  | D4 | Noise and vibration | Sound pressure level  Maximum average sound level (Lmax) | dB | Measurement of noise and vibration levels producing during the entire life cycle using standard methods established for construction projects | < 80 dB |  | Parry and Broderick, 2014  BS4142 |
|  |  |  | D5 | Duration |  | day | Duration of the construction works, including land preparation before and after NBS deployment |  | Related to the ability of providing stabilisation through the NBS actions before the occurrence of new events. Related to the acceptability and perception of the NBS project |  |
|  |  | Bio-geophysical | D6 | Season |  | Qlt. | Recommended season for planting and plant propagation, as well as for soil workability |  | Related to the ability of the vegetation to get established on the NBS action. Related to the ability of using locally available plant materials. Related to the ability of encouraging the public to participate in the deployment works. | Schiechtl and Stern, 1996 |
|  |  |  | D7 | Deployment footprint |  | m2 | Ground area used for construction |  | Related to the transformation of the local landscape with the NBS action. Related to the acceptability and perception of the NBS. |  |
| MONITORING (M) | Eco-engineering performance | Engineering | M1 | Resistance to sliding | Active earth force  Shear resistance | N m-1    N m-1 | Resistance of the NBS structure and foundations against sliding due to normal loading | Active earth force < shear resistance | Related to the ability of the NBS action to provide sustained stability. Related to the provision of stable bio-geophysical conditions permitting plant development and establishment. Also related to the acceptability and perception of the NBS | EN-1997-1 |
|  |  |  | M2 | Resistance to overturning | Active earth force  Overturning resistance | N m-1    N m-1 | Resistance of the NBS structure and foundations against overturning due to lateral earth pressure | Active earth force < overturning resistance | Same as above | EN-1997-1 |
|  |  |  | M3 | Resistance to shear failure | Wall-face contribution to stability | N m-1 | Resistance of the NBS structure to fail in shear due to normal and lateral loads |  | Same as above | EN-1997-1 |
|  |  |  | M4 | Resistance to bending | Bending stiffness | N m-1 | extent to which an timber member of the NBS structure resists [deformation](https://en.wikipedia.org/wiki/Deformation_(mechanics)) in response to the normal and lateral loads |  | Same as above | EN-1997-1 |
|  |  |  | M5 | Pull-out resistance | Pull-out force | N m-1 | Force that would have to be applied to pull out the timber members of the NBS structure from the soil/slope in which they are embedded |  | Same as above | BS EN 1383:2016 |
|  |  |  | M6 | Resilience and durability of the structure | Wood decay |  | Stability of the NBS structure over time when subjected to climate variability and hydro-meteorological drivers |  | Same as above | EN 1995-1-1  Tardio and Mickovski, 2016 |
|  |  | Bio-geophysical | M7 | Plant cover | Plant counts  Crown area  Plant biomass  Canopy cover fraction  Plant mortality | No m-2  m2 m-2  kg m-2  %  No | Proportion of ground covered by canopy/vegetation - Quantification of plant cover through plant individual counts, crown spread, light penetration, and/or harvested plant biomass using stratified quadrats sampling approaches. Also, quantification of plant mortality within a given NBS action - counting number of death plants |  | Related to the establishment of the plant cover on the NBS action and its ability to provide hydrological and mechanical stability to the NBS action. Related to aesthetic perception and acceptance of the NBS action | Muukkonen and Makipaa, 2006  Keeton, 2008  Gonzalez-Ollauri and Mickovski, 2017d |
|  |  |  | M8 | Plant growth | Height  Basal area  Crown area  Leaf area index  Canopy cover fraction | m  m2  m2  m2 m-2  % | Quantification of plant metrics indicating plant establishment and development |  | Related to the establishment of the plant cover on the NBS action and its ability to provide hydrological and mechanical stability to the NBS action. Related to aesthetic perception and acceptance of the NBS action | Passioura, 2002  Gonzalez-Ollauri et al., 2020 |
|  |  |  | M9 | Plant diversity | Shannon index | - | Quantification of plant diversity through a stratified random sampling approach, plant species identification and counts, and diversity indices |  | Related to ecological stability of the NBS action and its integration within the local landscape. Related to the provision of ecosystem services such as habitat support and provision | Gonzalez-Ollauri and Mickovski, 2017d |
|  |  |  | M10 | Rainfall partitioning | Rainfall interception  Stemflow  Dripfall | mm    mm  mm | Partition of rainfall in the canopy into throughfall, stemflow and dripfall |  | Related to the ability of the plant cover established on the NBS action to regulate the water cycle, providing hydrological stability to the NBS action | Zimmermann and Zimmermann, 2014  Gonzalez-Ollauri and Mickovski, 2017a  Gonzalez-Ollauri et al. 2020 |
|  |  |  | M11 | Raindrops impact energy | Raindrop size | m | Impact of raindrops on the detachment of soil particles |  | Related to the ability of the plant cover established on the NBS action to reduce erosion | Vaezi et al., 2017  Nanko et al., 2004 |
|  |  |  | M12 | Root profile | Root area ratio | % | Proportion of rooted soil with depth |  | Related to the ability of the plant cover established on the NBS action to provide mechanical and hydrological reinforcement belowground. Also, related to the ability of the NBS action to sustain life belowground. | Gonzalez-Ollauri and Mickovski, 2016 |
|  |  |  | M13 | Root reinforcement | Root pull-out force  Root tensile strength  Apparent root cohesion | MPa    MPa    kPa | Added soil strength by plant roots |  | Related to the ability of the plant cover established on the NBS action to provide mechanical reinforcement belowground, promoting stability against landslides and erosion. | Gonzalez-Ollauri and Mickovski, 2017b  Schwarz et al., 2010  Stokes et al., 2008 |
|  |  |  | M14 | Soil wetness | Volumetric soil moisture content  Matric suction  Piezometric level  Soil wetness index | %      kPa  m | Degree of water saturation in the soil |  | Related to soil strength, to the water available to plants in the soil, to the ability of the soil to sustain life, and to the ability of the plant cover established on the NBS to provide hydrological and mechanical reinforcement effectively | Lu and Godt, 2010  Basist et al., 2006 |
|  |  |  | M15 | Soil temperature |  | oC | Temperature of the soil in a defined depth; affecting biogeochemical processes |  | Related to the ability of the soil in the NBS action to sustain life and stimulate root growth. Related to the occurrence of bio-geochemical reactions belowground related to the adequate functioning of the soil ecosystem (e.g. soil respiration). Also related to the occurrence of hydrological fluxes belowground which are related to the hydrological performance of the NBS action | Alvarez-Uria and Körner, 2007  Meyer et al., 2018  Gonzalez-Ollauri et al., 2020 |
|  |  |  | M16 | Soil respiration | CO2 efflux | mol m-2 s-1 | Quantification of soil CO2 flux as a proxy for soil respiration. CO2 is quantified from soil flux chambers using IRGA or gas chromatography. Flux is measured over an hour and then repeats are undertaken on a monthly basis to evaluate NBS evolution |  | Related to soil health and quality and the adequate provision of soil functions. Related to the regulation of the C-cycle, carbon footprint of the NBS and its contribution to climate adaptation. Also related to the occurrence of hydrological fluxes belowground | Raich and Tufekcioglu, 2000 |
|  |  |  | M17 | Soil fauna | Soil fauna index  Species counts  Shannon Index | No | Presence/absence of soil micro and mesofauna as an indicator of soil health and evolution. |  | Related to soil health and quality and the adequate provision of soil functions. Related to the provision of ecosystem services by the NBS action such as habitat support and provision. | Yan et al., 2012  Briones, 2014 |
|  |  |  | M18 | Evapotranspiration | Potential evapotranspiration rate | mm m-2 d-1 | The process by which water becomes vapor from land surfaces and through the process of plant transpiration and water uptake |  | Related to soil wetness. Related to the ability of the plant cover established on the NBS to uptake water from the soil and provide hydrological reinforcement in the NBS action. Related to the regulation of the water cycle | Priestly and Taylor, 1973  Allen et al., 1998  Feng et al., 2020 |
|  |  |  | M19 | Belowground preferential flow | Bypass flow rate | mm s | transport of water and solutes via macropore-dominated pathways of soils |  | Related to the formation of perched water tables belowground and the development of stress conditions affecting the internal stability of the NBS action. Also related to the transport of nutrients and organic matter belowground which can facilitate biogeochemical processes in depth and the subsequent provision of soil functions | Clothier et al., 2008  Zhang et al., 2018  Gonzalez-Ollauri et al., 2020 |
|  | Socio-ecological | Economic | M20 | Energy use | Energy performance index (EPI) | kWh m-2 | Calculation of energy consumption per unit area of NbS during the NbS construction phase and over its life cycle -e.g. management phases. EPI rates range from A (highest energy performance) to G (lowest energy performance) |  | Related to the total cost of the NBS actions. Related to the carbon footprint and to the overall economic performance of the NBS. Also related to the acceptance/perception of the NBS actions | UK government, 2017  Bakar et al., 2015 |
|  |  |  | M21 | Water consumption | Water consumption  Water exploitation index (WEI+) | m3 m-2  % | Water consumption per unit area of an NBS during implementation and during operational service.  WEI+ is a measure of total fresh water use as a percentage of the renewable fresh water resources (groundwater and surface water) at a given time and place. |  | Related to the total cost of the NBS actions. Related to the environmental footprint and to the overall economic performance of the NBS. Also related to the acceptance/perception of the NBS actions | Thomback et al., 2015  EEA, 2021 |
|  |  |  | M22 | Waste generation |  | Kg m-2 | Calculation of waste generation in mass per unit area of NbS during the NbS construction and over its life cycle |  | Same as above | Bakashan et al., 2015 |
|  |  |  | M23 | Whole life cost |  | £ | Calculation of the total costs generated during the construction, monitoring, and management phases of a NbS relative to the potential economic income generated |  | Related to the overall economic performance of the NBS. Also related to the acceptance/perception of the NBS actions |  |
|  |  |  | M24 | Operational cost |  | £ | Calculation of the total costs generated during the monitoring and management phases of a NbS relative to the potential economic income generated |  | Same as above |  |
|  |  |  | M25 | Value of provided resources |  |  |  |  |  |  |
|  |  |  | M26 | Employment generation |  |  |  |  |  |  |
|  |  |  | M27 | Quality of construction | CONQUAS score | % | Set of metrics established under the umbrella of CONQUAS, which is a standard assessment system on the quality of building projects. The assessment focuses on (i) structural works, (ii) architectural works, and (iii) M&E works. |  | Related to the resilience and durability of the NBS structure. Related to the overall economic performance of the NBS and to their acceptance/perception. | Low and Ong, 2014 |
|  |  | Ecosystem services and co-benefits | M28 | Accessibility of natural space |  | m2  % | Calculation of the amount of natural space protected or created through NBS, as a percentage of total area of study site |  | Related to NBS co-benefits | Frumkin et al, 2017 |
|  |  |  | M29 | Aesthetic perception |  | Qlt | Survey on aesthetic of landscape before and after NBS implementation |  | Related to the provision of ecosystem services and to the perception/acceptability of the NBS actions | Daniel, 2001 |
|  |  |  | M30 | Recreation | Organised recreation groups    Informal recreation activities | Number  Qlt | Survey establishing number of recreational groups whose activity is protected or provided for by NBS.  Survey establishing how stakeholders use study site for recreation before and after NBS implementation |  | Related to the provision of ecosystem services and to the perception/acceptability of the NBS actions | Sutton-Grier et al, 2015 |
|  |  |  | M31 | Stakeholder engagement with co-creation |  | Number | Number of stakeholders and people involved in the co-creation and co-deployment phases |  | Related to public willingness to engage with NBS co-creation | Soini et al, 2020 |
|  |  |  | M32 | Changes in well-being |  | Qlt | Survey establishing self-reported physical and mental wellbeing after NBS implementation i.e. increased nature access, reduce risk |  | Related to the provision of ecosystem services and to the perception/acceptability of the NBS actions | Van den Bosch and Sang, 2017 |
|  |  |  | M33 | Tourism generation |  | Number  %  Qlt | Survey establishing increased numbers of tourist visits after NBS implementation as a % increase of visits prior |  | Same as above | Sutton-Grier et al, 2015 |
|  |  |  | M34 | Cultural heritage |  | m2 | Increase or protection of areas of natural or cultural significance |  | Same as above | Sutton-Grier et al, 2015 |
|  |  |  | M35 | Materials provided |  | Number | Types of resources protected or provided through NBS implementation |  | Same as above | De Groot et al, 2002 |
|  |  |  | M36 | Habitat provision |  | Number  m2 | Number and/or area of habitat created through NBS implementation |  | Same as above | Sutton-Grier et al, 2015 |
|  |  |  | M37 | Habitat support |  | Number  m2 | Number and/or area of habitat protected through NBS implementation |  | Same as above | Sutton-Grier et al, 2015 |
|  |  |  | M38 | Air quality regulation | Daily Air Quality Index | Qlt. | levels of air pollution before and after NBS implementation; it provides recommended actions and health advice. The index is numbered 1-10 and divided into four bands, low (1) to very high (10), to provide detail about air pollution levels in a simple way, similar to the sun index or pollen index. |  | Related to the provision of ecosystem services and to the perception/acceptability of the NBS actions | Defra, 2021 |
|  |  |  | M39 | Water cycle regulation | soil water mass balance |  | Soil water mass balance in the NBS through the evaluation of the mechanisms by which soil and vegetation regulate the hydrological cycle – before and after NBS implementation |  | Related to the provision of ecosystem services and to the perception/acceptability of the NBS actions | Voltz et al., 2018 |
|  |  |  | M40 | Carbon cycle regulation | Soil organic carbon  Woodland carbon code | mg kg-1  tCO2 ha-1 | Carbon mass balance in plant-soil system - Estimation of carbon capture by the plant cover and soil before and after NBS implementation |  | Related to the provision of ecosystem services and to the perception/acceptability of the NBS actions | Harden et al., 2017  Forestry Commission, 2018 |
|  |  |  | M41 | Climate regulation | Heat regulation index  Moisture regulation index |  | Ability of NBS ecosystem to regulate heat and moisture – function of changes in sensible and latent heat as a result of land cover changes |  | Related to the provision of ecosystem services and to the perception/acceptability of the NBS actions | West et al., 2011 |
|  |  |  | M42 | Landscape quality | Landscape quality indicator |  | Assessment of landscape quality encompassing everything from basic utilitarian wants (food, water, shelter, recreation opportunities, etc.) to spiritual needs (oneness with nature, sense of a higher power) to intrinsic natural values |  | Related to the enhancement of the aesthetic quality of the landscape in which the NBS actions are deployed. Also related to the provision of other ecosystem services such as habitat support and provision and to the perception/acceptability of the NBS actions | Daniel, 2001  Sowińska-Świerkosz and ., Michalik-Śnieżek, 2020 |
| UPSCALING (U) |  | Socio-ecological | U1 | Stakeholder engagement with co-creation |  | Number | Number of stakeholders and people involved in the co-creation and co-deployment phases , informing engagement framework to upscale within similar demographic area |  | Related to public willingness to engage with NBS co-creation | Soini et al, 2020 |
|  |  |  | U2 | Stakeholder perception and acceptance |  | Qlt | Qualitative evaluation of preferences and acceptance for interventions, informing engagement framework to upscale within similar demographic area |  | Related to how NBS options are viewed by stakeholders in terms of costs, maintenance, aesthetic etc. Related to motivating factors in co-creation | Anderson et al, 2021 |
|  |  |  | U3 | Hazard perception |  | Qlt | Qualitative survey / focus groups on the extent to which the population perceive themselves and the study area to be at physical, economic or social risk from the landslide hazard informing engagement framework to upscale within similar demographic area |  | Relating to perception of risk and perceived need for intervention which is indicative of NBS acceptance and engagement with co-creation | Shah et al, 2020 |
|  |  |  | U4 | Ecosystem services provision |  | Number  Monetary value (£) | Type and range of social, economic and ecological ecosystem services and co-benefits provided through implementation of NBS |  | Related to the provision of ecosystem services and to the perception/acceptability of the NBS actions | Keesstra et al 2018 |
|  |  |  | U5 | Recreation | Organised recreation groups    Informal recreation activities | Number  Qlt | Survey establishing number of recreational groups whose activity is protected or provided for by NBS.  Survey establishing how stakeholders use study site for recreation before and after NBS implementation |  | Related to the provision of ecosystem services and to the perception/acceptability of the NBS actions | Sutton-Grier et al, 2015 |
|  |  |  | U6 | Tourism generation |  | Number    %    Qlt | Survey establishing increased numbers of tourist visits after NBS implementation as a % increase of visits prior |  | Related to the provision of ecosystem services and to the perception/acceptability of the NBS actions | Sutton-Grier et al, 2015 |
|  |  |  | U7 | Employment generation |  | Number  % | Number of new employment opportunities (either individual appointments or introduction of new businesses) created due to provision of NBS |  | Related to NBS socioeconomic co-benefits | Wild et al, 2017 |
|  |  | Bio-geophysical | U8 | Climatic attributes | Rainfall  Air temperature  Sunshine duration  Atmospheric pressure | See above | Set of climatic metrics related to the occurrence of hydro-meteorological hazards and with NBS performance which enable to foresee the performance of upscaled NBS actions at sites with similar climatic attributes |  |  |  |
|  |  |  | U9 | Topographic attributes | Topographic slope  Topographic aspect  Topographic curvature | See above | Set of topographic attributes related to the occurrence of hydro-meteorological hazards and with NBS location and performance which enable to foresee the performance of upscaled NBS actions at sites with similar topographic attributes |  |  |  |
|  |  |  | U10 | Soil attributes | Soil texture  Soil structure  Soil organic matter  Soil physicochemical properties  Soil nutrients  Soil strength  Soil water retention capacity  Soil workability  Soil potential | See above | Set of soil metrics related to the occurrence of hydro-meteorological hazards and with NBS deployment and performance which enable to foresee the performance of upscaled NBS actions at sites with similar soil attributes |  |  |  |
|  |  |  | U11 | Plant performance | Plant cover  Plant diversity  Plant growth  Plant biomass  Canopy cover fraction  Rainfall partitioning  Root development  Root reinforcement  Root-induced preferential flow | See above | Set of plant-related metrics conveying information about plant establishment, development, and soil reinforcement performance. |  |  |  |
|  |  | Eco-engineering | U12 | Hazard mitigation | Slope stability  Erosion rate | See above | Set of metrics providing evidence on the ability of the NBS to mitigate the hazard under concern |  |  | Gonzalez-Ollauri and Mickovski, 2017c |
|  |  |  | U13 | Quality of construction | CONQUAS score | See above | Set of metrics established under the umbrella of CONQUAS, which is a standard assessment system on the quality of building projects. The assessment focuses on (i) structural works, (ii) architectural works, and (iii) M&E works. |  |  |  |
|  |  |  | U14 | Structure durability | Wood decay    Structural deformation | mm year-1  Qlt. | Durability of the NBS structure during which it provides slope stability and protection. Durability is measured in terms of the decay of the structural timber members and of the integrity/displacement of the original structure. |  |  | Tardio and Miskovsky, 2016 |
